# Supplementary material for: Fungal Mycobiome of Mature Strawberry Fruits (Fragaria x ananassa Variety ‘Monterey’) Suggests a Potential Market Site Contamination with Harmful Yeasts
Source: MDPI journal article supplement (doi:10.3390/foods13081175), 2024-04-12
Supplement: s1 [file s1]

Supplementary materials

# Fungal Mycobiome of Mature Strawberry Fruits (*Fragaria x ananassa* Variety 'Monterey') Suggests a Potential Market Site Contamination with Harmful Yeasts

Gabriela N. Tenea \*, Pamela Reyes and Diana Molina

Biofood and Nutraceuticals Research and Development Group, Faculty of Engineering in  
Agricultural and Environmental Sciences, Universidad Técnica del Norte, 100150 Ibarra,  
Ecuador

\* Correspondence: gntenea@utn.edu.ec

Figure S1: Illustration of rarefaction curves. Legend: F4L1-ITS: F4L6-ITS: fruits collected from the orchard; FP1-ITS:FP6-ITS: fruits purchased from the market.

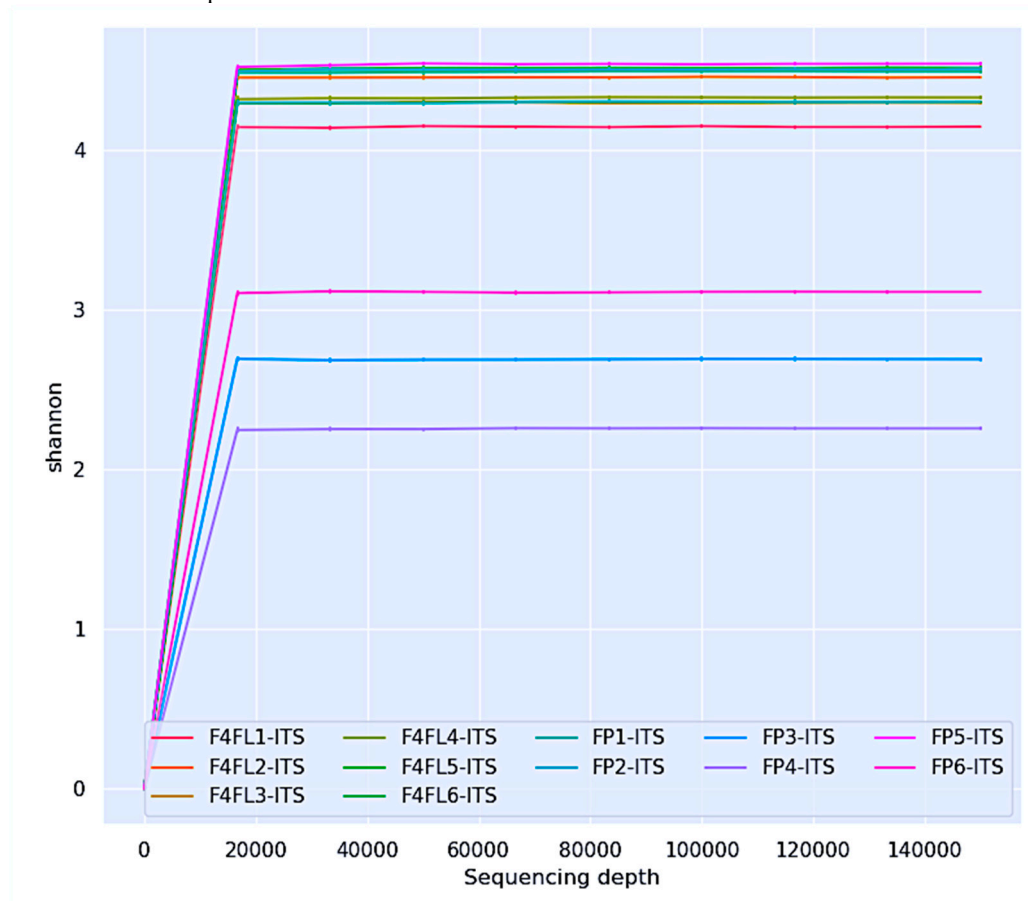

Figure S2: A volcano plot showing the ANCOM model W statistic.

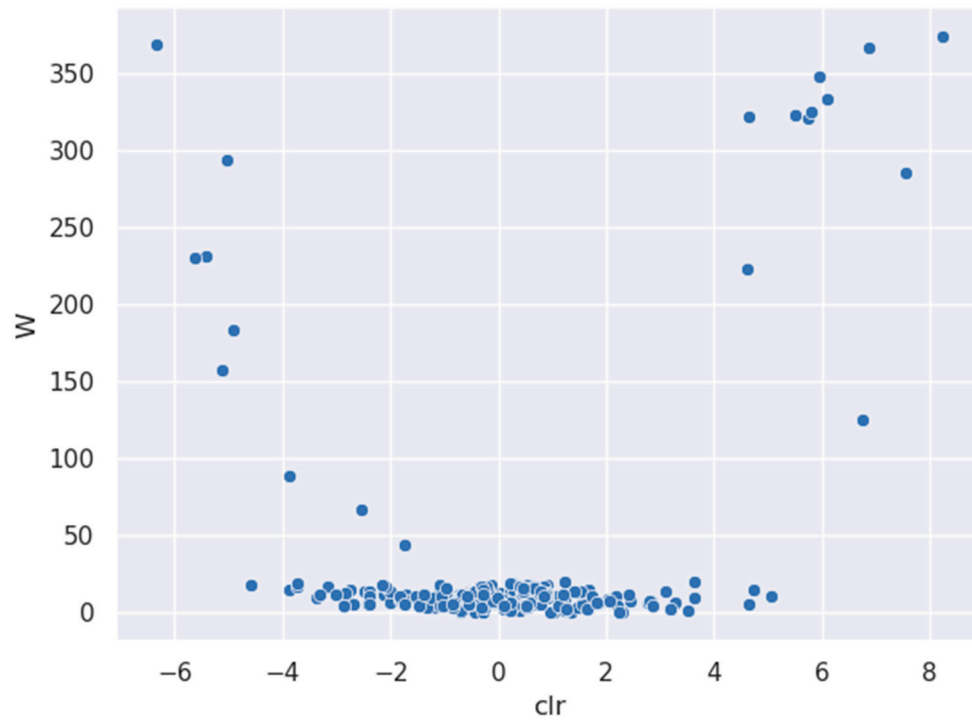

Figure S3: Venn diagram showing the number and percentage of shared fungi (A) genus, and (B) species level.

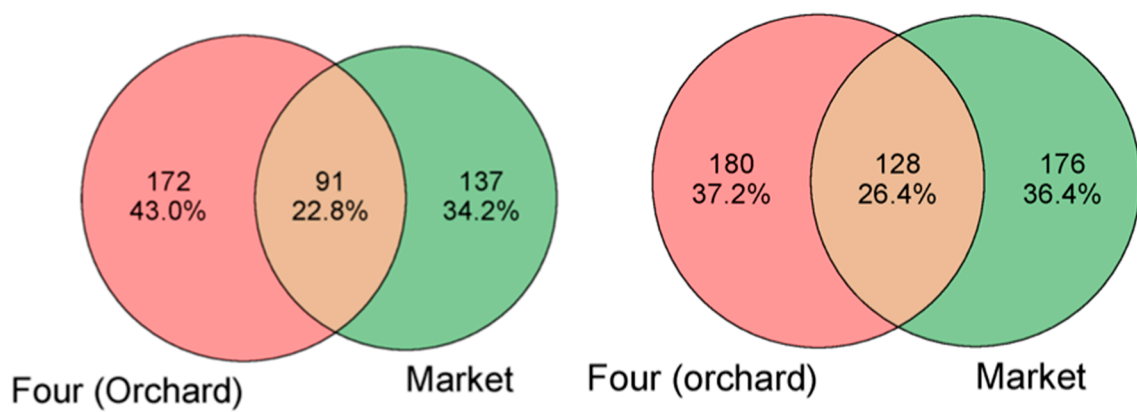

Figure S4: Phylogenetic tree derived from ITS2 sequences data showing the position of the most abundant fungal taxon. Color nodes in the tree are features (taxonomic annotation to the family level). Internal nodes where all descendants have the same feature metadata value are themselves considered to have that value. Bar plots are the groups metadata.

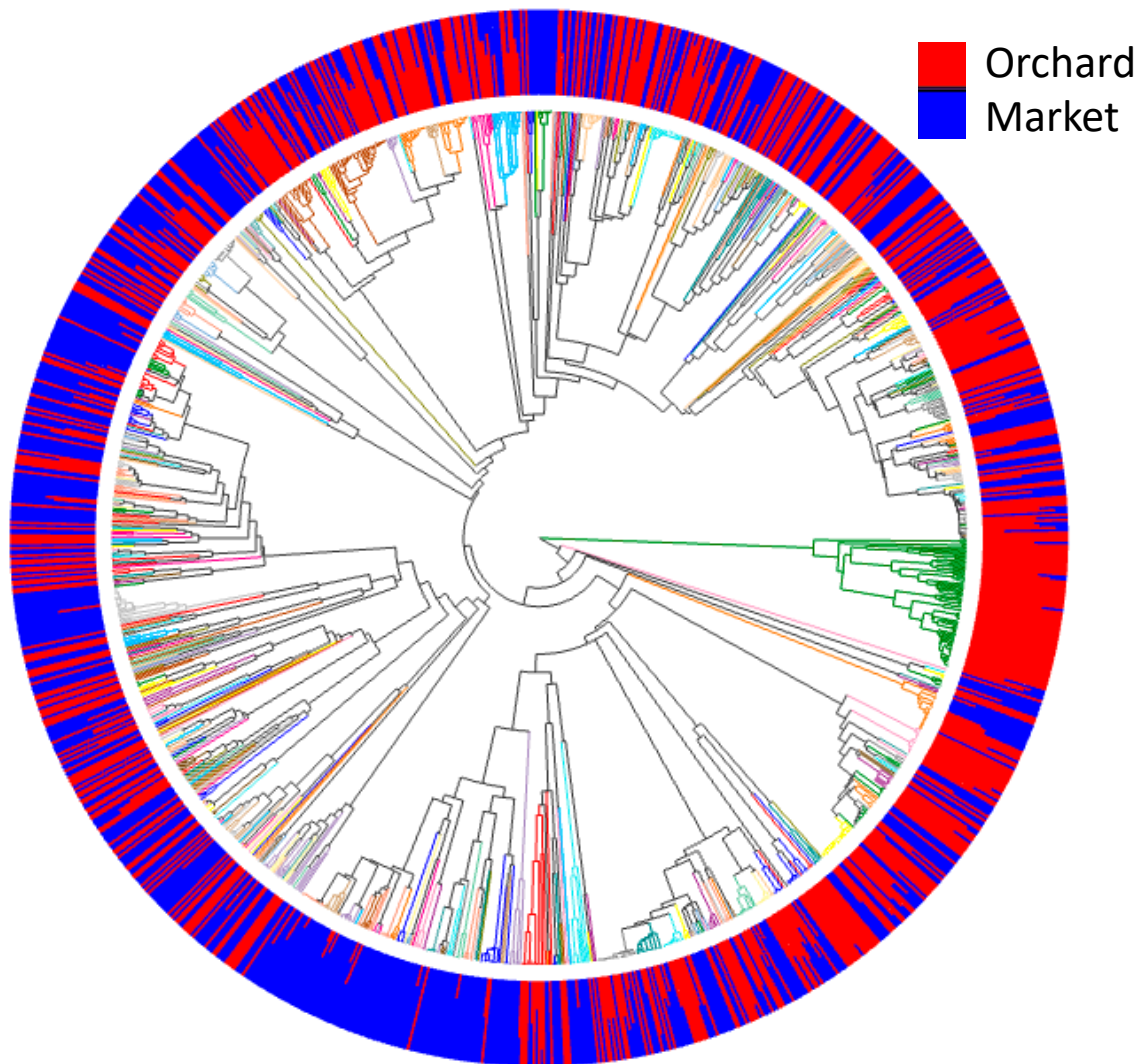

Table S1. DADA2 statistics of input and filtered reads.

| sample-id | Input  | filtered | percentage of input passed filter | denoised | merged | percentage of input merged | non-chimeric | percentage of input non-chimeric |
|-----------|--------|----------|-----------------------------------|----------|--------|----------------------------|--------------|----------------------------------|
| F4FL1-ITS | 402166 | 274966   | 68.37                             | 274294   | 249699 | 62.09                      | 249157       | 61.95                            |
| F4FL2-ITS | 413205 | 259061   | 62.7                              | 258323   | 234064 | 56.65                      | 233380       | 56.48                            |
| F4FL3-ITS | 362685 | 251092   | 69.23                             | 250745   | 224918 | 62.01                      | 224724       | 61.96                            |
| F4FL4-ITS | 374315 | 249823   | 66.74                             | 249554   | 231034 | 61.72                      | 230731       | 61.64                            |
| F4FL5-ITS | 473020 | 294291   | 62.22                             | 293716   | 272461 | 57.6                       | 271758       | 57.45                            |
| F4FL6-ITS | 330732 | 181704   | 54.94                             | 181389   | 158520 | 47.93                      | 158184       | 47.83                            |
| FP1-ITS   | 536563 | 347337   | 64.73                             | 346999   | 321390 | 59.9                       | 320593       | 59.75                            |
| FP2-ITS   | 457487 | 323935   | 70.81                             | 323401   | 306142 | 66.92                      | 305628       | 66.81                            |
| FP3-ITS   | 479798 | 332582   | 69.32                             | 332384   | 305789 | 63.73                      | 305233       | 63.62                            |
| FP4-ITS   | 546063 | 401669   | 73.56                             | 401393   | 377459 | 69.12                      | 376760       | 69                               |
| FP5-ITS   | 395658 | 278264   | 70.33                             | 278032   | 265122 | 67.01                      | 265001       | 66.98                            |
| FP6-ITS   | 241369 | 158184   | 65.54                             | 157860   | 151598 | 62.81                      | 151217       | 62.65                            |

F4L1-ITS: F4L6-ITS-fruits collected from the orchard ( ripe phase four); FP1-ITS: FP6-ITS: fruits purchased from the market (ripe phase four).
